# Supplementary material for: Mesenchymal Stromal Cells from Fetal and Maternal Placenta Possess Key Similarities and Differences: Potential Implications for Their Applications in Regenerative Medicine
Source: MDPI journal article supplement (doi:10.3390/cells9010127), 2020-01-06
Supplement: s1 [file s1]

# SUPPLEMENTARY TABLE 1

**Supplementary Table 1.** Cytokine/chemokine profile of maternal and fetal MSCs. PLX-PAD, PLX-R18 and hAMSC cultured for 6 days, experiments were performed in parallel to those performed for Th subset differentiation. The supernatant was collected at day 6 and screened for the expression of cytokine and chemokine using the Flex Set kit by BD Biosciences. Data are represented as mean  $\pm$  SD ( $n = 4$ ).

|               | PLX-PAD           | PLX-R18            | hAMSC              |
|---------------|-------------------|--------------------|--------------------|
| IFN $\gamma$  | 2.6 $\pm$ 0.6     | 2.3 $\pm$ 1.3      | 3.3 $\pm$ 1.6      |
| TNF $\alpha$  | 3.3 $\pm$ 1.5     | 2.3 $\pm$ 1.7      | 4.6 $\pm$ 3.3      |
| IL-4          | 2.2 $\pm$ 0.7     | 1.4 $\pm$ 1.1      | 2.5 $\pm$ 1.5      |
| IL-5          | 0.1 $\pm$ 0.1     | 0.1 $\pm$ 0.0      | 0.1 $\pm$ 0.1      |
| IL-13         | 0.2 $\pm$ 0.3     | 0.5 $\pm$ 0.5      | 0.4 $\pm$ 0.4      |
| IL-17A        | 28.7 $\pm$ 8.2    | 25.6 $\pm$ 12.6    | 31.7 $\pm$ 9.6     |
| IL-10         | 20.6 $\pm$ 13.8   | 2.1 $\pm$ 1.1      | 8.6 $\pm$ 4.1      |
| TGF $\beta$ 1 | 930.0 $\pm$ 375.3 | 1501.3 $\pm$ 877.6 | 1309.9 $\pm$ 458.9 |
| GrzB          | 0.1 $\pm$ 0.2     | 0.2 $\pm$ 0.4      | 0.2 $\pm$ 0.2      |
| GrzA          | 0.4 $\pm$ 0.5     | 0.4 $\pm$ 0.4      | 0.3 $\pm$ 0.3      |
| RANTES        | 14.1 $\pm$ 11.6   | 67.6 $\pm$ 35.9    | 4.5 $\pm$ 2.3      |
